# Supplementary material
Source: MDPI journal article supplement (https://www.mdpi.com/2673-6284/11/1/5)
Supplement: s1 [file s1]

**Table S1. Summary characteristics of included studies. <sup>a</sup> (n = 202)**

| Reference                    | Country <sup>b</sup> | Patients                     | Number of cases/total individuals <sup>c</sup> | Staging (number)      | Specific Method of Sampling (Type of Sample)                     | Techniques                                                                               | Clinical applications                                                                                                                                                                                                                   |
|------------------------------|----------------------|------------------------------|------------------------------------------------|-----------------------|------------------------------------------------------------------|------------------------------------------------------------------------------------------|-----------------------------------------------------------------------------------------------------------------------------------------------------------------------------------------------------------------------------------------|
| Xiao et al. 2021 [146]       | China                | OSCC                         | 20/30                                          | NA                    | Liquid biopsy: 1) saliva; 2) urine                               | 1) Elisa and dot blot tests; Bacterial colony count; Flow cytometry<br>2) Flow cytometry | Oral cancer screening                                                                                                                                                                                                                   |
| Sugiyama et al. 2021 [99]    | Japanese             | OC                           | 32                                             | T1(12); T2(20)        | SLNB: sentinel lymph node                                        | H&E                                                                                      | Pathological SLN diagnosis                                                                                                                                                                                                              |
| Shaikh et al. 2021 [149]     | India                | OSMF                         | 15/20                                          | I (9); II (6)         | Liquid biopsy: saliva                                            | Total protein estimation by photometric test; ATR-FTIR                                   | As a screening tool for an early diagnosis OSMF                                                                                                                                                                                         |
| Shah et al. 2021 [190]       | India                | OPMD                         | 30                                             | NA                    | Solid biopsy*: oral lesions**                                    | Sediment cytology                                                                        | Preliminary diagnosis                                                                                                                                                                                                                   |
| Putri et al. 2021 [57]       | Indonesia            | OC                           | 26/54                                          | NA                    | Surgical biopsy: oral lesions                                    | VIA; VILI                                                                                | Histopathology examination                                                                                                                                                                                                              |
| Park et al. 2021 [100]       | Korea                | TSCC                         | 91/211                                         | T1/T2                 | SLNB: sentinel lymph node                                        | Frozen section analysis; H&E                                                             | Pathologic examination                                                                                                                                                                                                                  |
| Parfenova et al. 2021 [130]  | Canada               | OC                           | 92/214                                         | NA                    | Brush biopsy: suspicious clinical lesion                         | DNA- ICM                                                                                 | Non-invasive screening of high-grade oral lesions                                                                                                                                                                                       |
| Obade et al. 2021 [24]       | Malaya               | OSCC                         | 14/44                                          | NA                    | Surgical biopsy: oral lesions                                    | 1) SCOTT<br>2) H&E                                                                       | 1) To examine the ability of OCT to differentiate ex vivo epithelial structure of benign disorders, dysplastic, and OSCC in comparison with the structure of normal marginal mucosa of oral biopsies.<br>2) Histopathological diagnosis |
| Mahieu et al. 2021 [101]     | Netherlands          | OSCC                         | 20                                             | cT1-2N0M0             | SLNB: sentinel lymph node                                        | Serial-sectioning; IHC                                                                   | Histopathology                                                                                                                                                                                                                          |
| Mahieu et al. 2021 [98]      | Netherlands          | OSCC                         | 816                                            | cT1-2N0               | SLNB: sentinel lymph node                                        | IHC; H&E                                                                                 | Histopathology                                                                                                                                                                                                                          |
| Mada et al. 2021 [25]        | India                | OC                           | 16/24                                          | T2(8); T3(1); T4(7)   | 1) Surgical biopsy: oral lesions<br>2) Liquid biopsy: saliva     | 1) H&E<br>2) PAP; MGG                                                                    | 1) Histopathological diagnosis<br>2) Cytological analysis                                                                                                                                                                               |
| Li et al. 2021 [191]         | China                | OPMD                         | 810                                            | NA                    | 1) Brush biopsy: oral lesion<br>2) Surgical biopsy: oral lesions | 1) DNA-ICM<br>2) NA                                                                      | 1) Oral cancer screening; Establish risk model based on DNA aneuploidy for the detection of oral cancer; Prognostic marker<br>2) Histopathological examination                                                                          |
| Giovannacci et al. 2021 [26] | Italy                | OPMD                         | 60                                             | NA                    | Surgical biopsy: oral lesions                                    | H&E                                                                                      | Histopathological diagnosis                                                                                                                                                                                                             |
| Gaida et al. 2021 [108]      | Germany              | Clearly visible oral lesions | 2018                                           | NA                    | Brush biopsy: oral lesion                                        | PAP                                                                                      | Cytological analysis                                                                                                                                                                                                                    |
| Galíndez et al. 2021 [192]   | Argentina            | OSCC/OPDM                    | 140                                            | NA                    | Brush biopsy: oral lesion                                        | PAP; DNA extraction; Genotyping                                                          | To improve prevention and early diagnosis.                                                                                                                                                                                              |
| Falamas et al. 2021 [151]    | Romania              | OSCC                         | 19/32                                          | II(5); III(2); IV(12) | Liquid biopsy:saliva                                             | Micro-Raman; FT-IR                                                                       | Diagnosis of oral and oropharyngeal cancer                                                                                                                                                                                              |
| den Toom et al. 2021 [97]    | Netherlands          | OSCC                         | 20                                             | cT1-2N0M0             | SLNB:sentinel lymph node                                         | H&E                                                                                      | Histopathological diagnosis                                                                                                                                                                                                             |

|                                  |             |               |        |                         |                                                                           |                                                 |                                                                                                  |
|----------------------------------|-------------|---------------|--------|-------------------------|---------------------------------------------------------------------------|-------------------------------------------------|--------------------------------------------------------------------------------------------------|
| de Koning et al. 2021 [27]       | Netherlands | SCCT          | 91     | NA                      | Tissue biopsy: oral lesion                                                | H&E                                             | Histopathological examination                                                                    |
| de Kerangal et al. 2021 [95]     | France      | OSCC          | 94     | T1-T2cN0                | SLNB: sentinel lymph node                                                 | Frozen section; H&E                             | Histopathological examination                                                                    |
| Boeve et al. 2021 [96]           | Netherlands | OSCC          | 91     | cT1-2N0/ pT1-2          | SLNB: sentinel lymph node                                                 | 1) H&E<br>2) IHC                                | 1) Tissue microarray construction<br>2) Identification of tumor markers                          |
| Aaboubout et al. 2021 [193]      | Netherlands | OCSCC         | 415    | NA                      | Surgical biopsy: oral lesions                                             | Specimen-driven intraoperative assessment       | The frequency, type and results of intraoperative assessment of resection margins were analyzed. |
| Yokoyama et al. 2020 [94]        | Japan       | OC            | 11     | NA                      | SLNB: sentinel lymph node                                                 | Frozen section; H&E                             | Histopathological examination                                                                    |
| Wojakowska et al. 2020 [153]     | Poland      | OSCC          | 10/20  | NA                      | Liquid biopsy: blood                                                      | Exosome isolation; Metabolite Extraction; GC-MS | Metabolites that differentiated cancer and control samples.                                      |
| Wei et al. 2020 [194]            | USA         | OC            | NA     | NA                      | 1) CEUS-CNB: suspicious lesions<br>2) Surgical biopsy: suspicious lesions | NA                                              | Histopathological examination                                                                    |
| Wang et al. 2020 [122]           | UK          | OPC           | 10     | NA                      | Liquid biopsy: saliva                                                     | Western Blot Analysis; ddPCR                    | Detecting HPV16                                                                                  |
| Vigili et al. 2020 [93]          | Italy       | OSCC          | 48     | T1-T2N0                 | SLNB: sentinel lymph node                                                 | H&E                                             | Histopathological examination                                                                    |
| Velleuer et al. 2020 [109]       | Germany     | OC            | 713    | NA                      | Brush biopsy: oral lesion                                                 | 1) PAP<br>2) DNA-ICM                            | 1) Cytological investigation;<br>2) DNA ploidy analysis                                          |
| Smits et al. 2020 [195]          | Netherlands | OCSCC         | 174    | NA                      | Surgical biopsy: oral lesions                                             | Intraoperative assessment                       | Identification of excision margins; Histopathological evaluation                                 |
| Sivadasan et al. 2020 [148]      | India       | OSCC          | NA     | NA                      | Liquid biopsy: saliva                                                     | Proteomic analysis; LC-MS/MS; ELISA             | Identification of candidate biomarkers for the early detection of oral squamous carcinoma.       |
| Sandhya et al. 2020 [196]        | India       | OSCC          | 112    | NA                      | USG-FNAC: oral lesions                                                    | NA                                              | Cytopathological evaluation; Histopathological examination                                       |
| Rathod et al. 2020 [92]          | India       | OC            | 20     | I/II                    | SLNB: sentinel lymph node                                                 | IHC; H&E                                        | Histopathological examination                                                                    |
| Li et al. 2020 [197]             | China       | OPMD          | 401    | NA                      | Brush biopsy: oral lesion                                                 | DNA-ICM                                         | Detection of dysplasia and/or cancer in OPMD                                                     |
| Kim et al. 2020 [89]             | Korea       | OC            | 9      | T1/T2                   | ICG-Guided SLNB: sentinel lymph node                                      | H&E                                             | Histopathological examination                                                                    |
| Ishiguro et al. 2020 [90]        | Japan       | Tongue cancer | 27     | NA                      | SLNB: sentinel lymph node                                                 | H&E                                             | Pathological examination                                                                         |
| Ines Criscuolo et al. 2020 [125] | Argentina   | OSCG          | 72/144 | NA                      | 1) Brush biopsy: oral lesion<br>2) Liquid biopsy: saliva                  | PCR                                             | HPV detection; Cytological analysis                                                              |
| Hernando et al. 2020 [91]        | Spain       | OSCC          | 12     | T1/T2                   | SLNB: sentinel lymph node                                                 | IHC; H&E                                        | Histopathological examination                                                                    |
| Hasegawa et al. 2020 [198]       | Japan       | OSCC          | 141    | II(59); III(34); IV(48) | Surgical biopsy: oral lesions                                             | NA                                              | Histopathological examination                                                                    |
| Durham et al. 2020 [199]         | Canada      | OSCC          | 457    | T1/T2                   | Surgical biopsy: oral lesions                                             | NA                                              | Histopathological examination                                                                    |

|                                |            |                      |        |                       |                                                                            |                                                          |                                                                                               |
|--------------------------------|------------|----------------------|--------|-----------------------|----------------------------------------------------------------------------|----------------------------------------------------------|-----------------------------------------------------------------------------------------------|
| Crimi et al. 2020 [144]        | Italy      | OC                   | 10/20  | NA                    | Liquid biopsy: blood                                                       | ddPCR                                                    | Bioinformatics Analyses                                                                       |
| Bhatia et al. 2020 [28]        | India      | OSMF                 | 24     | II(8); III(10); IV(6) | 1) MBB: buccal mucosa<br>2) Punch biopsy: buccal mucosa                    | 1) PAP<br>2) H&E                                         | 1) LBC<br>2) Histopathological examination                                                    |
| Azab et al. 2020 [137]         | Egypt      | OSCC/ OPMD           | 63/93  | NA                    | Liquid biopsy: saliva                                                      | qPCR; Calculation of the DNA integrity index             | Diagnostic abilities                                                                          |
| Aggarwal et al. 2020 [200]     | India      | OPMD                 | 200    | NA                    | Surgical biopsy: oral lesions                                              | NA                                                       | Histopathological examination                                                                 |
| Vishnoi et al. 2019 [88]       | India      | OSCC                 | 94     | cT1/T2, N0            | SLNB: sentinel lymph node                                                  | IHC; H&E                                                 | Histopathological examination                                                                 |
| Tang et al. 2019 [138]         | Australia  | OPC                  | 127    | NA                    | Liquid biopsy: saliva                                                      | qPCR                                                     | Detecting HPV16                                                                               |
| Sun et al. 2019 [201]          | China      | OSCC/ OPMD           | 269    | NA                    | Brush biopsy: oral lesion                                                  | 1) DNA-ICM<br>2) H&E                                     | 1) Assessment of the cancerization risk in OPMD patients;<br>2) Histopathological examination |
| Raman et al. 2019 [110]        | India      | OSCC                 | 150    | NA                    | Biopsy with spatula: buccal mucosa                                         | 1) PAP<br>2) MGP                                         | 1) Cytological diagnosis<br>1) Cytomorphometry                                                |
| Muraki et al. 2019 [29]        | Japan      | OSCC                 | 89     | NA                    | Surgical biopsy: oral lesions                                              | IHC; H&E                                                 | Histopathological examination                                                                 |
| Mishra et al. 2019 [202]       | India      | OSMF                 | 15/30  | NA                    | Surgical biopsy: oral lesions                                              | IHC                                                      | Detection of human telomerase reverse transcriptase (hTERT) protein telomerase expression     |
| Kujan et al. 2019 [188]        | Australian | OSCC/ OLK            | 55     | NA                    | 1) Brush biopsy: oral lesion<br>2) Surgical biopsy: oral lesions           | 1) OLBC<br>2) IHC                                        | A combined index score of OLBC grading and protein expression was calculated.                 |
| Gnanatheepam et al. 2019 [203] | India      | OC                   | 88/101 | NA                    | Biopsy with scalpel: oral lesion                                           | SLS                                                      | Diagnosis of oral cancer.                                                                     |
| Deuerling et al. 2019 [110]    | Germany    | OSCC                 | 1359   | NA                    | Brush biopsy: oral lesion                                                  | PAP                                                      | Cytological diagnosis                                                                         |
| Riese et al. 2018 [87]         | Germany    | OC                   | 36     | cN0/ cM0              | SLNB: sentinel lymph node                                                  | 1) H&E<br>2) IHC                                         | 1) Histopathological examination<br>2) Detection of anti-pancytokeratin epithelial markers    |
| Rai et al. 2018 [152]          | India      | OSMF                 | 30/60  | NA                    | Liquid biopsy: blood                                                       | 1) FTIR Spectra Measurement<br>2) Chemometric Techniques | Diagnostic prediction and prognostication of OSF                                              |
| Pereira et al. 2018 [112]      | India      | OSCC/ OPMD           | 20/30  | NA                    | 1) Oral rinse-based technique: expectorate<br>2) Brush biopsy: oral lesion | PAP                                                      | Cytological diagnosis                                                                         |
| Kiran et al. 2018 [113]        | India      | OSCC/ED              | 30/60  | NA                    | Biopsy with spatula: buccal mucosa                                         | PAP                                                      | Cytological diagnosis                                                                         |
| Eisenberg et al. 2018 [155]    | USA        | Oropharyngeal cancer | 395    | NA                    | Liquid biopsy: saliva                                                      | DNA analysis                                             | Detection of any HPV                                                                          |
| Alsarraaf et al. 2018 [114]    | Australia  | OSCC/ OPMD           | 10     | NA                    | 1) Brush biopsy: oral lesion<br>2) Surgical biopsy: oral lesions           | 1) PAP<br>2) NA                                          | 1) Cytology diagnosis<br>2) Histopathological examination                                     |
| Al-Dam et al. 2018 [204]       | Germany    | OC                   | 20     | Ct1/cT2N0             | SLNB: sentinel lymph node                                                  | NA                                                       | Histopathological examination                                                                 |

|                              |             |                       |        |                              |                                                                  |                                                                 |                                                                                                                                                                                                     |
|------------------------------|-------------|-----------------------|--------|------------------------------|------------------------------------------------------------------|-----------------------------------------------------------------|-----------------------------------------------------------------------------------------------------------------------------------------------------------------------------------------------------|
| Zarate et al. 2017 [126]     | Argentina   | OPMD/OC               | 93/111 | NA                           | Brush biopsy: oral lesion                                        | PCR                                                             | P53 genotyping                                                                                                                                                                                      |
| Tang et al. 2017 [139]       | Australia   | HNSCC                 | 68/110 | I(3); II(1); III(11); IV(49) | Liquid biopsy: saliva                                            | RT-qPCR                                                         | To investigate the mRNA expression profiles of CKs                                                                                                                                                  |
| Rezazadeh et al. 2017 [205]  | Iran        | OSCC                  | 28/48  | NA                           | Brush biopsy: oral lesion                                        | ICC                                                             | Identifying cytological biomarkers                                                                                                                                                                  |
| Remmerbach et al. 2017 [115] | Germany     | OSCC                  | 81/133 | NA                           | Brush biopsy: oral lesion                                        | PAP                                                             | LBC                                                                                                                                                                                                 |
| Quang et al. 2017 [30]       | Mexico      | OC                    | 100    | NA                           | Punch biopsy: oral lesion                                        | 1) H&E<br>2) IHC                                                | 1) Histopathological examination<br>2) Detection of markers                                                                                                                                         |
| Perera et al. 2017 [206]     | Australia   | OSCC/ FEP             | 52     | NA                           | Surgical biopsy: oral lesions                                    | 1) RT-PCR<br>2) HTS                                             | To characterize the mycobiome                                                                                                                                                                       |
| Peisker et al. 2017 [154]    | Germany     | OSCC                  | 30/60  | NA                           | Liquid biopsy: saliva                                            | Immunoreactivity assay                                          | Cancer detection                                                                                                                                                                                    |
| Parakh et al. 2017 [207]     | India       | OPMD                  | 40     | NA                           | Punch biopsy: oral lesion                                        | NA                                                              | Histopathological examination                                                                                                                                                                       |
| Nanami et al. 2017 [208]     | Japan       | OSCC/ OPMD            | 62     | NA                           | Surgical biopsy: oral lesions                                    | NA                                                              | Histopathological examination                                                                                                                                                                       |
| Nair et al. 2017 [209]       | India       | OSCC                  | 40/80  | NA                           | Liquid biopsy: blood                                             | Colorimetry                                                     | Determination of BChE levels                                                                                                                                                                        |
| Miura et al. 2017 [86]       | Japan       | OSCC                  | 57     | N0                           | SLNB: sentinel lymph node                                        | 1) H&E<br>2) AE1/3 cytokeratin stain                            | 1) Histopathological examination<br>2) Final postoperative diagnosis                                                                                                                                |
| Liese et al. 2017 [31]       | Germany     | OPMD                  | 27     | NA                           | Surgical biopsy: oral lesions                                    | H&E                                                             | Histopathological examination                                                                                                                                                                       |
| Lassig et al. 2017 [164]     | USA         | OSCC                  | 20     | NA                           | Liquid biopsy: surgical drain fluid                              | Electrochemiluminescence; Patterned array; Multiplex technology | Differences in cytokine and MMP levels by disease outcomes were evaluated.                                                                                                                          |
| Jajodia et al. 2017 [32]     | India       | OSCC                  | 48     | NA                           | 1) Brush biopsy: oral lesion<br>2) Punch biopsy: oral lesion     | 1) CC; LBC; AgNOR staining<br>2) H&E                            | 1) Screening for suspected malignant oral lesions<br>2) Histopathological examination                                                                                                               |
| Ishikawa et al. 2017 [210]   | Japan       | OC                    | 22/66  | NA                           | Liquid biopsy: saliva                                            | Metabolomic analysis                                            | Detection of markers                                                                                                                                                                                |
| Grillone et al. 2017 [33]    | USA         | OSCC                  | 34     | NA                           | Surgical biopsy: oral lesions                                    | H&E                                                             | Histopathological examination                                                                                                                                                                       |
| Elimairi et al. 2017 [58]    | Sudan       | OSCC                  | 28     | NA                           | Surgical biopsy: oral lesions                                    | 1) Lugol's iodine staining<br>2) NA                             | 1) Detection of oral cancer and dysplastic lesions as well as demarcation of the extent of these lesions<br>2) Histopathological examination                                                        |
| da Silva et al. 2017 [34]    | Brazil      | OSCC/ OPMD            | 52     | NA                           | 1) Brush biopsy: oral lesion<br>2) Surgical biopsy: oral lesions | 1) ICC; IHC<br>2) H&E; ICC; IHC                                 | To assess the immunocytochemical and immunohistochemical correlation of adhesion (E-cadherin) and cell differentiation (involucrin) molecules in oral leukoplakia and oral squamous cell carcinoma. |
| Boeve et al. 2017 [85]       | Netherlands | Oral maxillary cancer | 11     | NA                           | SLNB: sentinel lymph node                                        | H&E; IHC                                                        | Histopathological examination                                                                                                                                                                       |
| Angelelli et al. 2017 [35]   | Italy       | OC                    | 46     | NA                           | Surgical biopsy: oral lesions                                    | H&E                                                             | Histopathological examination                                                                                                                                                                       |

|                              |                       |                                              |         |                |                                                                                      |                                                              |                                                               |
|------------------------------|-----------------------|----------------------------------------------|---------|----------------|--------------------------------------------------------------------------------------|--------------------------------------------------------------|---------------------------------------------------------------|
| Agarwal et al. 2016 [211]    | India                 | OSCC                                         | 231     | NA             | SLNB: sentinel lymph node                                                            | NA                                                           | Histopathological examination                                 |
| Buchakjian et al. 2016 [22]  | USA                   | OSCC                                         | NA      | NA             | Surgical biopsy: oral lesions                                                        | Frozen section                                               | Tumor margin evaluation                                       |
| Conway et al. 2016 [145]     | UK                    | OPC                                          | 1212    | NA             | Liquid biopsy: saliva                                                                | Nucleic acid extraction; HPV genotyping;                     | HPV prevalence and diversity                                  |
| Hettmann et al. 2016 [132]   | Hungary               | HNCC                                         | NA      | NA             | 1) Liquid biopsy: saliva<br>2) Punch biopsy: oral lesion                             | PCR; Sequencing                                              | Phylogenetic Analysis                                         |
| Hiraki et al. 2016 [84]      | Japan                 | OSCC                                         | 125     | cN0            | SLNB: sentinel lymph node                                                            | H&E                                                          | Histopathological examination                                 |
| Husso et al. 2016 [212]      | Finland               | OSCC                                         | 10      | T1-2N0/ T2-4N0 | SLNB: sentinel lymph node                                                            | Frozen section                                               | Histopathological examination                                 |
| Kaur et al. 2016 [116]       | India                 | OC                                           | 100     | NA             | Brush biopsy: oral lesion                                                            | 1) DNA-ICM;<br>2) May Grünwald giemsa; H&E; PAP              | 1) DNA ploidy analysis<br>2) Cytologic examination            |
| Lejoy et al. 2016 [213]      | India                 | OPMD                                         | 75      | NA             | Punch biopsy: oral lesion                                                            | NA                                                           | Histopathological examination                                 |
| Martin et al. 2016 [140]     | USA                   | OPMD                                         | 168     | NA             | Liquid biopsy: saliva                                                                | qPCR                                                         | Validation of Reference Genes for Oral Cancer Detection       |
| Nanayakkara et al. 2016 [36] | Sri Lanka             | OPMD                                         | 192     | NA             | 1) Brush biopsy/biopsy with spatula: oral lesion<br>2) Surgical biopsy: oral lesions | 1) PAP<br>2) H&E                                             | 1) Cytologic examination<br>2) Histopathological examination  |
| Sagheb et al. 2016 [214]     | Germany               | TSCC                                         | 10      | <T3            | SLNB: sentinel lymph node                                                            | NA                                                           | Histopathological examination                                 |
| Takeda et al. 2016 [59]      | Japan                 | OSCC                                         | 35      | NA             | Surgical biopsy: oral lesions                                                        | RT-PCR; IHC; Immunofluorescence staining                     | mtDNA copy numbers and expressions of PGC-1 $\alpha$ and TFAM |
| Tartaglione et al. 2016 [83] | UK                    | OSCC                                         | 434     | cT1-T2cN0      | SLNB: sentinel lymph node                                                            | H&E; IHC                                                     | Histopathological examination                                 |
| Zahran et al. 2015 [141]     | Arabia                | OSCC/OPMD                                    | 60/100  | NA             | Liquid biopsy: saliva                                                                | Microarray platform and qPCR                                 | miRNA expression analysis                                     |
| Sivadasan et al. 2015 [150]  | India                 | Healthy individuals                          | NA      | NA             | Liquid biopsy: saliva                                                                | Mass spectrometry and Proteomic analysis                     | Serve a reference about oral malignancies markers             |
| Schilling et al. 2015 [82]   | 14 European countries | SCC                                          | 415/480 | T1–T2N0        | SLNB: sentinel lymph node                                                            | Frozen section and H&E                                       | Detect metastasis                                             |
| Peng et al. 2015 [103]       | China                 | Oral/oropharyngeal carcinoma                 | 26      | cT1-2N0M0      | SLNB: sentinel lymph node                                                            | 1) Near-infrared imaging with ICG<br>2) Embedded in paraffin | 1) Identify sentinel node<br>2) Pathologic examination        |
| Nakamura et al. 2015 [102]   | Japan                 | Squamous cell carcinoma of the head and neck | 19      | T1-T2, N0      | Surgical biopsy: oral lesions<br>SLNB: sentinel lymph node                           | 1) RI and ICG<br>2) Gamma ray probe                          | 1) Identify sentinel node<br>2) Identified radioactivity      |
| Mulki et al. 2015 [117]      | India                 | OSCC                                         | 25/108  | NA             | 1) Liquid biopsy: saliva<br>2) Brush biopsy: accessible areas                        | PAP                                                          | Early screening of oral cancer                                |

|                                |             |                                       |        |              |                                                                                               |                                                                          |                                                                                                                                  |
|--------------------------------|-------------|---------------------------------------|--------|--------------|-----------------------------------------------------------------------------------------------|--------------------------------------------------------------------------|----------------------------------------------------------------------------------------------------------------------------------|
| Hartmann et al. 2015 [187]     | Germany     | OSCC                                  | 15/72  | T1-T4, N1-N3 | 1) Oral brush biopsy: oral mucosa<br>2) Surgical biopsy: suspicious lesions                   | Melanoma-associated antigens A staining                                  | 1) Investigate the usability, specificity, sensitivity, and diagnostic accuracy of oral brush biopsy<br>2) As the gold standard. |
| Hande et al. 2015 [37]         | India       | OC                                    | 40     | NA           | Surgical biopsy: pathological lesion and the contralateral mirror image biopsy site           | 1) H&E<br>2) Immunohistochemical method for the detection of p53 antigen | 1) Pathologic examination<br>2) Predict the altered state of oral mucosa secondary to carcinogen exposure                        |
| Graham et al. 2015 [215]       | UK          | Oropharyngeal carcinomas              | 45/57  | NA           | brush biopsy: oral mucosa                                                                     | Dielectrophoretic method                                                 | Early identification of oral cancer in primary cancer                                                                            |
| Den Toom et al. 2015 [81]      | Netherlands | OSCC                                  | 90     | T1-T2, cN0   | SLNB: sentinel lymph node                                                                     | H&E and pan-cytokeratin antibody (AE 1/3)                                | Pathologic examination                                                                                                           |
| De Bree et al. 2015 [38]       | Netherlands | HNCC                                  | 6      | cN0          | 1) USG-FNAC: sentinel lymph node                                                              | H&E and pan-cytokeratin antibody (AE 1/3)                                | Better selection of lymph nodes at the highest risk of having metastases                                                         |
| Chinnannavar et al. 2015 [157] | India       | OC                                    | 52/104 | NA           | Liquid biopsy: venous blood                                                                   | Biochemical estimation and ninhydrin method                              | Diagnosis and determine the clinical stage                                                                                       |
| Yang et al. 2014 [147]         | USA         | OSCC                                  | 11/31  | NA           | 1) Liquid biopsy: saliva<br>2) Brush biopsy: oral mucosa                                      | Western blotting and reporter gene assays                                | Testing the secretory leukocyte protease inhibitor as a biomarker                                                                |
| Ma et al. 2014 [105]           | China       | OC                                    | 4/52   | NA           | Brush biopsy: location of the mucosal lesion                                                  | 1) Feulgen staining<br>2) DNA-image cytometry                            | 1) Measure the Nuclear DNA contents (ploidy)<br>2) Screening method for the detection of precancerous oral lesions               |
| Gupta et al. 2014 [39]         | India       | Oral precancerous lesions             | 877    | NA           | 1) Tongue blade and modified brush biopsy<br>2) Punch/surgical biopsy                         | 1) Modified PAP<br>2) H&E                                                | 1) Examine dysplastic changes in the cells<br>2) Pathologic examination                                                          |
| Chianeh et al. 2014 [216]      | India       | OSCC                                  | 25/55  | Stage 2-4    | Liquid biopsy: saliva                                                                         | 5,5'-dithiobis, 2-nitrobenzoic acid (DTNB/Ellman's reagent)              | Determine the marker (Salivary protein thiols and Butyrylcholinesterase)                                                         |
| Schussel et al. 2013 [133]     | USA         | OC                                    | 30/191 | NA           | Liquid biopsy: saliva                                                                         | Quantitative Methylation Specific PCR                                    | Hypermethylation were associated with premalignant or malignant disease                                                          |
| Riaz et al. 2013 [217]         | India       | OPMD                                  | 50/120 | NA           | Surgical biopsy: the most obvious methylene blue staining area                                | Routine pathologic diagnosis                                             | Examine the accuracy of the diagnostic capability of methylene blue                                                              |
| Mori et al. 2013 [218]         | Japan       | OSCC                                  | 20/47  | NA           | 1) Brush biopsy: tongue and buccal mucosa<br>2) Surgical biopsy: oral lesions                 | 1) RT-PCR<br>2) The electrochemical telomerase assay                     | 1) Determine telomerase reverse transcriptase expression<br>2) Evaluate telomerase activity                                      |
| Maurer et al. 2013 [124]       | Germany     | Head and neck squamous cell carcinoma | 26     | NA           | Brush biopsy: diseased area and healthy buccal mucosa of the corresponding contralateral area | MALDI-ToF Mass Spectrometry                                              | Early cancer diagnosis                                                                                                           |
| Matthews et al. 2013 [142]     | UK          | OSCC                                  | 45     | NA           | Liquid biopsy: saliva                                                                         | qPCR                                                                     | DNA biomarker analysis                                                                                                           |
| Kaemmerer et al. 2013 [219]    | USA         | OPMD                                  | 70     | NA           | 1) Brush biopsy: mucosal lesion<br>2) Surgical biopsy: mucosal lesion                         | 1) H&E and DNA-ICM examination<br>2) Embedded in paraffin                | 1) Examine tumor cells or suspicious cells and measure the Nuclear DNA contents (ploidy)<br>2) Pathologic examination            |
| Graveland et al. 2013 [40]     | Netherlands | OPMD                                  | 23     | NA           | 1) Brush biopsy: mucosal lesion<br>2) Surgical biopsy: mucosal lesion                         | 1) p53 IHC<br>2) H&E and p53 IHC                                         | 1) LOH analysis<br>2) LOH analysis, TP53 mutation analysis and histopathological grading                                         |



|                                  |             |                                          |         |              |                                                                   |                                                          |                                                                                       |
|----------------------------------|-------------|------------------------------------------|---------|--------------|-------------------------------------------------------------------|----------------------------------------------------------|---------------------------------------------------------------------------------------|
| Galle et al. 2013 [220]          | Italy       | OSCC/OPMD                                | 103     | NA           | Biopsy with swabs: lesions                                        | 1) Presumptive germ tube test<br>2) PAS and GMS staining | To support the presence of Candida spp. in oral cancer and precancerous lesions       |
| Flach et al. 2013 [221]          | Netherlands | OC                                       | 285     | T1-T2N0      | USG-FNAC                                                          | Make cytological smear                                   | Pathologic examination                                                                |
| Bianca et al. 2013 [41]          | Brazil      | OSCC                                     | 172     | NA           | 1) Brush biopsy: oral lesions<br>2) Surgical biopsy: oral lesions | 1) PAP<br>2) H&E                                         | 1) Cytopathological diagnosis<br>2) Pathologic examination                            |
| Cankovic et al. 2013 [222]       | Serbia      | OSCC                                     | 30      | T1-T3, N0-N1 | Biopsy: oral lesion                                               | NA                                                       | Pathologic examination                                                                |
| Yoshimoto et al. 2012 [223]      | Japan       | Laryngeal, hypopharyngeal or oral cancer | 177     | NA           | SLNB: sentinel lymph node                                         | HE                                                       | Pathologic examination                                                                |
| Meric et al. 2012 [224]          | Turkey      | Smoker                                   | 78      | NA           | Punch biopsy: oral mucosa                                         | Immunohistochemical analysis                             | Determine expression of p65 NF- $\kappa$ B, p38 MAPK, and iNOS                        |
| Melkane et al. 2012 [80]         | France      | OSCC                                     | 53      | T1, T2 N0    | SLNB: sentinel lymph node                                         | H&E and anti-cytokeratin 22 immunohistochemistry         | Pathologic examination                                                                |
| MacAulay et al. 2012 [225]       | Canada      | OSCC/OPMD                                | 148/369 | NA           | Brush biopsy: oral lesions                                        | Modified Feulgen-Thionin staining                        | The amount and the distribution of DNA in the nucleus                                 |
| Lohavanichbutr et al. 2012 [226] | USA         | OSCC                                     | NA      | NA           | Surgical biopsy: mucosal lesion                                   | PCR                                                      | Teste Gene Expression                                                                 |
| Kugimoto et al. 2012 [134]       | Japan       | OSCC                                     | 89/185  | NA           | Liquid biopsy: saliva                                             | PCR                                                      | Oral cancer screening                                                                 |
| Terada et al. 2011 [79]          | Japan       | OSCC                                     | 61      | cT1-2, cT3   | SLNB: sentinel lymph node                                         | H&E                                                      | Pathologic examination                                                                |
| Saini et al. 2011 [42]           | Malaysia    | OSCC                                     | 105/210 | NA           | 1) Surgical biopsy: oral lesions<br>2) Brush biopsy: oral lesions | 1) H&E<br>2) PCR                                         | 1) Pathologic examination<br>2) The analysis of p53 codon 72 arginine/proline alleles |
| Remmerbach et al. 2011 [123]     | Germany     | OSCC                                     | 27/37   | NA           | Brush biopsy: lesion and healthy buccal aspects                   | Mass spectrometry                                        | Pre-symptomatic screening detection                                                   |
| Paderni et al. 2011 [227]        | Italy       | OSCC/OPMD                                | 175     | NA           | Surgical or punch biopsy: oral lesions                            | Direct visualization of the oral tissue autofluorescence | Early recognition and diagnosis                                                       |
| Kolokythas et al. 2011 [228]     | USA         | OSCC                                     | NA      | NA           | Brush biopsy: oral lesions                                        | RT-PCR                                                   | Reproducibility of mRNA quantification                                                |
| Weigum et al. 2010 [229]         | USA         | Visible oral lesion                      | 41/52   | NA           | Brush biopsy: oral lesions                                        | Fluorescent labeling                                     | Early detection of oral cancer                                                        |
| Rajput et al. 2010 [118]         | India       | OPMD                                     | 34/44   | NA           | Brush biopsy: suspicious oral lesions                             | PAP and AgNOR staining                                   | Early detection of oral cancer                                                        |
| Jalouli et al. 2010 [127]        | Sweden      | OSCC                                     | 217/423 | NA           | Brush biopsy: buccal mucosa or labial sulcus                      | PCR                                                      | Detection of EBV and HSV                                                              |
| Delavarian et al. 2010 [119]     | Iran        | OSCC/OPMD                                | 25      | NA           | 1) Brush biopsy: oral lesions<br>2) Surgical biopsy: oral lesions | PAP                                                      | Screening of oral premalignant and malignant lesions                                  |
| Civantos et al. 2010 [78]        | USA         | OC                                       | 140     | T1-T2, N0    | SLNB: sentinel lymph node                                         | H&E                                                      | To detect the effectiveness of SLNB                                                   |
| Remmerbach et al. 2009 [107]     | Germany     | OSCC/OPMD                                | 47      | NA           | 1) Brush biopsy: oral lesions<br>2) Surgical biopsy: oral lesions | 1) PAP, Feulgen Staining and Ag-NOR Analysis<br>2) NA    | 1) Multimodal cell analysis for the early detection<br>2) Pathologic examination      |

|                                    |             |           |         |              |                                                                                            |                                         |                                                                                     |
|------------------------------------|-------------|-----------|---------|--------------|--------------------------------------------------------------------------------------------|-----------------------------------------|-------------------------------------------------------------------------------------|
| Hohlweg et al. 2009 [230]          | Germany     | OSCC      | 15/75   | NA           | 1) Brush biopsy: oral lesions<br>2) Surgical biopsy: oral lesions                          | Histological examination                | Test sensitivity and specificity of oral brush biopsy                               |
| Burns et al. 2009 [76]             | Ireland     | OSCC      | 13      | T1–T3N0      | SLNB: sentinel lymph node                                                                  | H&E and cytokeratin staining            | Evaluate metastatic disease                                                         |
| Atula et al. 2009 [77]             | UK          | OSCC      | 107     | NA           | SLNB: sentinel lymph node                                                                  | H&E and AE1/AE3 staining                | Pathologic examination                                                              |
| Terada et al. 2008 [104]           | Japan       | OC        | 44      | NA           | SLNB: sentinel lymph node                                                                  | HE, MGG and PAP                         | Pathologic examination                                                              |
| Santaolalla et al. 2008 [75]       | Spain       | OSCC      | 22      | T1T2T3cN0    | SLNB: sentinel lymph node                                                                  | H&E, cytokeratin AE1/AE3 staining       | Pathologic examination                                                              |
| Sanjay et al. 2008 [231]           | India       | OSCC      | 30/60   | NA           | Liquid biopsy: saliva                                                                      | Biochemical analysis of saliva          | Early detection of cancer                                                           |
| Navone et al. 2008 [232]           | Italy       | OSCC/OPMD | 164     | NA           | 1) Brush biopsy(curette): oral lesions<br>2) Surgical biopsy: oral lesions                 | Processed histologically                | To value the accuracy of micro-biopsies                                             |
| Matsuzuka et al. 2008 [71]         | Japan       | OSCC      | 10      | NA           | SLNB: sentinel lymph node                                                                  | H&E                                     | Measure the area of malignant tumor and that of residual normal lymph tissue        |
| Keski et al. 2008 [72]             | Finland     | OSCC      | 13      | pT1N0        | SLNB: sentinel lymph node                                                                  | H&E and cytokeratin AE1/AE3             | Evaluate micrometastasis                                                            |
| Chone et al. 2008 [73]             | Brazil      | HNCC      | 35      | cN0          | SLNB: sentinel lymph node                                                                  | H&E                                     | Pathologic examination to test occult metastasis                                    |
| Bilde et al. 2008 [74]             | Denmark     | OSCC      | 51      | T1T2N0M0     | SLNB: sentinel lymph node                                                                  | H&E and cytokeratin AE1/AE3             | Pathologic examination to determine lymph node metastases                           |
| Vigili et al. 2007 [69]            | Italy       | OSCC      | 12      | cT1-T2N0     | SLNB: sentinel lymph node                                                                  | H&E and cytokeratin AE1/AE3             | Immunohistochemistry analysis                                                       |
| Upile et al. 2007 [179]            | UK          | OSCC      | 40      | T stage I/II | Surgical biopsy: oral lesions                                                              | Methylene blue and microendoscope       | Determination of surgical margins                                                   |
| Thomsen et al. 2007 [70]           | Denmark     | OSCC      | 40      | T1T2 cN0     | SLNB: sentinel lymph node                                                                  | H&E and cytokeratin                     | Pathologic examination                                                              |
| Sandro J Stoeckli et al. 2007 [68] | Switzerland | OSCC      | 79      | T1T2         | SLNB: sentinel lymph node                                                                  | H&E                                     | Pathologic examination to assess the feasibility of SLNB                            |
| Majumder et al. 2007 [135]         | India       | OSCC      | 310/923 | NA           | Liquid biopsy: blood                                                                       | PCR                                     | Determined genotypes                                                                |
| Hirshberg et al. 2007 [233]        | Israel      | OSCC/OPMD | 29/54   | NA           | 1) Brush biopsy: oral lesions and opposite normal site<br>2) Surgical biopsy: oral lesions | 1) H&E<br>2) MGG and I-FISH experiments | 1) Pathologic examination<br>2) Detect non-diploid cells to enhance early detection |
| Gupta et al. 2007 [43]             | India       | OPMD      | 96      | NA           | 1) Brush biopsy: oral lesions<br>2) Surgical biopsy: oral lesions                          | 1) PAP<br>2) H&E                        | Evaluate the usefulness of toluidine blue and brush biopsy                          |
| Chen et al. 2007 [234]             | China       | OPMD      | 58      | NA           | Surgical biopsy: oral lesions                                                              | NA                                      | Pathologic diagnosis                                                                |



|                              |          |                                   |     |                           |                                                                            |                                                                                   |                                                                      |
|------------------------------|----------|-----------------------------------|-----|---------------------------|----------------------------------------------------------------------------|-----------------------------------------------------------------------------------|----------------------------------------------------------------------|
| Terada et al. 2006 [67]      | Japan    | OC                                | 15  | N0                        | SLNB: sentinel lymph node                                                  | H&E                                                                               | Pathologic diagnosis                                                 |
| Songra et al. 2006 [235]     | UK       | OSCC                              | 26  | NA                        | Surgical biopsy: oral lesions                                              | Ultrasound scanning and histology                                                 | Evaluate the usefulness of ultrasound imaging                        |
| Poh et al. 2006 [236]        | Canada   | OSCC                              | 20  | T0-T2/<br>stage 0-II      | Punch biopsies: the tumor and tumor margins                                | NA                                                                                | Pathologic diagnosis                                                 |
| Maraki et al. 2006 [106]     | Germany  | OPMD                              | 58  | NA                        | 1) Brush biopsy(curette): oral lesions<br>2) Surgical biopsy: oral lesions | PAP; Feulgen Staining                                                             | Measurement of DNA contents and pathologic diagnosis                 |
| Kujan et al. 2006 [237]      | UK       | Healthy volunteer                 | 50  | NA                        | Brush biopsy: buccal mucosa and lateral border of tongue                   | FHIT immunocytochemistry staining                                                 | Early detection of cancer and precancer                              |
| Kovacs et al.2006 [61]       | Germany  | OSCC                              | 77  | T1–4aN0                   | SLNB: sentinel node                                                        | H&E; cytokeratin AE1/AE3                                                          | Pathologic diagnosis                                                 |
| Khafif et al. 2006 [238]     | Israel   | OSCC                              | 20  | T1-4N0                    | SLNB: sentinel node                                                        | NA                                                                                | Pathologic diagnosis; Immunohistochemistry examine                   |
| Gabriel et al. 2006 [156]    | USA      | Healthy volunteer                 | 56  | NA                        | 1) Liquid biopsy: blood, urine<br>2) Brush biopsy: oral lesions            | 1) High-performance liquid chromatography analysis<br>2) Sigma staining           | Examine the concentration of carotenoids, retinoids, and tocopherols |
| Civantos et al. 2006 [62]    | USA      | Oral and cutaneous malignancy     | 106 | T1 to T3                  | SLNB: sentinel node                                                        | H&E                                                                               | Pathologic diagnosis                                                 |
| Bilde et al. 2006 [63]       | Denmark  | OSCC                              | 34  | stage I and II (T1-2N0M0) | SLNB: sentinel node                                                        | Lymphoscintigraphic H&E and cytokeratin AE1/AE3                                   | Provide accurate information and Pathologic diagnosis                |
| Thomsen et al. 2005 [64]     | Denmark  | OSCC                              | 30  | T1 T2                     | SLNB: sentinel node                                                        | H&E and cytokeratin AE1/AE3                                                       | Pathologic diagnosis                                                 |
| Thomsen et al. 2005 [65]     | Denmark  | OSCC                              | 40  | T1 T2                     | SLNB: sentinel node                                                        | H&E and cytokeratin (CK 1)                                                        | Pathologic diagnosis                                                 |
| Thomsen et al. 2005 [66]     | Denmark  | OSCC                              | 40  | T1/T2 N0                  | SLNB: sentinel node                                                        | H&E and cytokeratin (CK-KL1)                                                      | Pathologic diagnosis                                                 |
| Ram et al. 2005 [44]         | Malaysia | OSCC                              | 40  | NA                        | Surgical biopsy: oral lesions                                              | H&E                                                                               | Pathologic diagnosis                                                 |
| Myo et al. 2005 [239]        | Japan    | OSCC                              | 45  | Stage I and II (T1-2N0M0) | Fine needle aspiration biopsy                                              | FISH analysis                                                                     | To evaluate the value of cyclin D1 gene numerical aberrations        |
| Minamikawa et al. 2005 [240] | Japan    | OSCC                              | 632 | NA                        | SLNB: sentinel node                                                        | Pathologic analysis                                                               | Evaluate the levels of metastatic lymph nodes                        |
| Hsu et al. 2005 [241]        | USA      | OC                                | NA  | NA                        | Surgical biopsy: oral lesions                                              | Molecular-specific fluorescent contrast; Agent and single-wavelength spectroscopy | Detection of the Molecular Changes                                   |
| Fischer et al. 2005 [242]    | USA      | Upper aerodigestive tract lesions | 75  | NA                        | 1) Punch biopsy: oral lesion<br>2) Surgical biopsy: oral lesions           | Staining                                                                          | Pathologic examination                                               |
| Sokolov et al. 2004 [45]     | USA      | OPMD                              | 25  | NA                        | Surgical biopsy: oral lesions                                              | H&E                                                                               | Histopathological examination                                        |
| Seoane et al. 2004 [46]      | Spain    | NA                                | 354 | NA                        | Surgical biopsy: oral lesions                                              | H&E                                                                               | Clinical and pathological diagnoses                                  |

|                                |         |                                   |         |                       |                                                                                     |                                                                                    |                                                                                                                                          |
|--------------------------------|---------|-----------------------------------|---------|-----------------------|-------------------------------------------------------------------------------------|------------------------------------------------------------------------------------|------------------------------------------------------------------------------------------------------------------------------------------|
| Maraki et al. 2004 [120]       | Germany | OC                                | 98      | NA                    | 1) Brush biopsy: oral suspicious lesions<br>2) Surgical biopsy: oral lesions        | 1) PAP; Detection of malignant cells<br>2) NA                                      | 1) Cytological diagnoses; detect malignant cells<br>2) Histopathological examination                                                     |
| Hamakawa et al. 2004 [243]     | Japan   | OC                                | 10      | T1/T2                 | SLNB: sentinel node                                                                 | RT-PCR                                                                             | Morphological diagnosis; Genetic diagnosis                                                                                               |
| Chikamatsu et al. 2004 [60]    | Japan   | OSCC                              | 11      | T2T3<br>N0N1N2bN2c    | SLNB: sentinel node                                                                 | H&E                                                                                | Examine for lymph node involvement due to tumor.                                                                                         |
| Beevi et al. 2004 [47]         | India   | OSCC                              | 15/30   | clinical stage III/IV | 1) Liquid biopsy: blood<br>2) Punch biopsy: oral mucosa                             | 1) Biochemical Measurements<br>2) H&E                                              | 1) To provide evidence of the relationship between lipid peroxidation and oral cavity cancer<br>2) Histopathology examination            |
| Remmerbach et al. 2003 [121]   | Germany | OSCC                              | 53/75   | NA                    | Brush biopsy: suspicious or pathological mucosal areas                              | PAP and AgNOR-staining                                                             | Cytopathological diagnosis and the number of AgNOR dots per nucleus distinguishing                                                       |
| Epstein et al. 2003 [244]      | Canada  | Upper aerodigestive tract cancer  | 30/668  | NA                    | 1) Liquid biopsy: saliva<br>2) Punch biopsy: suspicious lesions                     | 1) Tolonium chloride staining<br>2) NA                                             | 1) Decide whether lesion require an urgent biopsy<br>2) Pathologic examination                                                           |
| Werner et al. 2002 [245]       | Germany | The upper aerodigestive tract SCC | 48      | N0N1                  | SLNB: sentinel node                                                                 | NA                                                                                 | Pathologic examination                                                                                                                   |
| Weinstein et al. 2002 [136]    | USA     | Oral and pharynx cancer           | 519     | NA                    | 1) Liquid biopsy: blood, urine<br>2) Brush biopsy: mucosal surface                  | PCR and Laboratory analyses (Homocysteine and Methylenetetrahydrofolate Reductase) | Examined the relationships between serum homocysteine levels and methylenetetrahydrofolate reductase (MTHFR) C677T polymorphism genotype |
| McCullough et al. 2002 [48]    | UK      | OSCC/OPMD                         | 223     | NA                    | Surgical biopsy: suspicious lesions                                                 | PAS and H&E                                                                        | Assess the presence of yeast and Pathologic examination                                                                                  |
| da Costa et al. 2002 [49]      | Brazil  | Healthy individual                | 11      | NA                    | Surgical biopsy: lingual gingival margin of the right or left second upper premolar | H&E and PCNA                                                                       | Pathologic examination                                                                                                                   |
| Betz et al. 2002 [246]         | Germany | OSCC/OPMD                         | 85      | NA                    | Surgical biopsy: the site of the suspected or proven malignancy                     | NA                                                                                 | Pathologic examination                                                                                                                   |
| Nunes et al. 2000 [128]        | Brazil  | OSCC                              | 19/29   | NA                    | Brush biopsy: brush the tumor                                                       | PCR                                                                                | The detection of tumor DNA                                                                                                               |
| Kusukawa et al. 2000 [143]     | Japan   | OSCC                              | 20      | T1-T4                 | 1) Surgical biopsy: oral lesions<br>2) Liquid biopsy: blood                         | 1) NA<br>2) RT-PCR                                                                 | 1) Pathologic examination<br>2) Detection of microsatellite allele loss                                                                  |
| Harty et al. 2000 [129]        | USA     | OSCC                              | 219/367 | NA                    | Brush biopsy: oral mucosa and tongue                                                | PCR                                                                                | Assess the DNA quality                                                                                                                   |
| Hall et al. 2000 [189]         | UK      | NA                                | 52      | NA                    | Surgical biopsy: oral lesions                                                       | 1) Trypan blue exclusion assay<br>2) FACS analysis                                 | To assess viability measure the range in variation in fluid phase endocytic capability                                                   |
| Sciubba et al. 1999 [50]       | USA     | OSCC/OPMD                         | 945     | NA                    | 1) Brush biopsy: OralCDx specimens<br>2) Surgical biopsy: oral lesions              | 1) PAP; Stained slides then were scanned by the OralCDx computer system<br>2) H&E  | 1) Detection of innocuous-appearing oral cancers at early.<br>2) Histopathological examination                                           |
| Epstein et al. 1997 [247]      | UK      | OSCC                              | 81      | NA                    | Surgical biopsy: oral lesions                                                       | NA                                                                                 | Histologic examination                                                                                                                   |
| Erenmemisoglu et al. 1995 [51] | Turkey  | Tobacco users                     | 80      | NA                    | Surgical biopsy: buccal mucosa                                                      | 1) Cytological smears<br>2) H&E                                                    | Early detection                                                                                                                          |

|                              |          |                         |       |    |                                                             |                                                                                          |                                                                                |
|------------------------------|----------|-------------------------|-------|----|-------------------------------------------------------------|------------------------------------------------------------------------------------------|--------------------------------------------------------------------------------|
| Wood et al. 1994 [52]        | USA      | Oral leukoplakia        | 12/24 | NA | Punch biopsy: oral lesions                                  | 1) IHC<br>2) H&E                                                                         | 1) Accumulation of p53 protein was assessed<br>2) Histologic examination;      |
| Cox et al. 1993 [248]        | UK       | OSCC                    | 16/21 | NA | Surgical biopsy: oral lesions                               | DNA extraction; hybridization re-construction test; probe removal and re-use of DNA blot | Detection of HSV-1 and HPV type 16 DNA sequences                               |
| Bahr et al. 1992 [23]        | Germany  | OC                      | 24    | NA | Surgical biopsy: oral lesions                               | Frozen section                                                                           | Detection of tumor resection borders                                           |
| Migliorati et al. 1986 [53]  | USA      | OPMD                    | 20    | NA | 1) Punch biopsy: oral lesions<br>2) Liquid biopsy: blood    | 1) H&E<br>2) ABC-immunoperoxidase technique                                              | 1) Histologic examination<br>2) Phenotypic identification of mononuclear cells |
| Abdulkader et al. 1981 [249] | Malaysia | OC                      | 60    | NA | Punch biopsy: oral lesions                                  | 1) Saline extract<br>2) Immuno-electrophoresis                                           | Demonstration of a tumour associated antigen                                   |
| Benson et al. 1975 [250]     | USA      | OC                      | 73    | NA | Surgical biopsy: oral lesions                               | NA                                                                                       | Foretelling lesion outcome                                                     |
| Dunn et al. 1972 [251]       | NA       | Laryngeal/pharyngeal/OC | 44    | NA | 1) Surgical biopsy: oral lesions<br>2) Liquid biopsy: blood | NA                                                                                       | 1) Histopathology of lesions examined T<br>2) Testing for serum tetracycline   |
| Pindborg et al. 1971 [54]    | India    | OC                      | 10169 | NA | Punch biopsy: buccal mucosa                                 | H&E                                                                                      | Histologic examination                                                         |
| Pindborg et al. 1967 [55]    | India    | OC/ OSMF                | 100   | NA | Surgical biopsy: oral lesions lesions                       | H&E                                                                                      | Histologic examination                                                         |
| Glucksmann et al. 1967 [56]  | UK       | Buccal carcinoma        | 172   | NA | Surgical biopsy: oral lesions                               | H&E                                                                                      | The value of histological prognosis.                                           |

Abbreviations: OSCC: oral squamous cell carcinoma; OC: oral cancer; H&E: hematoxylin and eosin staining; OSMF: oral submucous fibrosis; ATR-FTIR: attenuated total reflection fourier transform infrared spectroscopy; OPMD: oral potentially malignant disorders; NA: no information given in the article; VIA: visual inspection acetic acid; USA: the United States of America; VILI: visual inspection with lugol's iodine; DNA-ICM: DNA-image cytometry; SSOCT: swept source optical coherence tomography; PAP: papanicolaou stain; MGG: may Grunwald Giemsa; FT-IR: fourier transform infrared spectroscopic techniques; SCCT: squamous cell carcinoma of the tongue; ddPCR: Droplet Digital polymerase chain reaction; OCSCC: oral cavity squamous cell carcinoma; LC-MS/MS: liquid chromatography and tandem mass spectrometry; ELISA: enzyme linked immunosorbent assay; FNAC: ultrasound-guided fine-needle aspiration cytology; IHC: immunohistochemistry; OSCG: oral squamous carcinoma group; MBB: modified brush biopsy; LBC: liquid-based cytology; OPC: oropharyngeal cancer; OLK: oral leukoplakia; OLBC: oral liquid-based brush cytology; SLS: synchronous luminescence spectroscopy; ED: epithelial dysplasia; HNSCC: head and neck cancer squamous cell carcinoma; RT-PCR: real-time polymerase chain reaction; FEP: fibro-epithelial polyps; HTS: high-throughput nucleotide sequencing; BChE: enzyme-butryl cholinesterase; CC: conventional cytology; LBC: liquid-based cytology; ICC: immunocytochemistry; HPV: human papilloma virus; UK: United Kingdom; TSCC: squamous cell carcinoma of the tongue; PGC-1 $\alpha$ : peroxisome proliferator-activated receptor gamma coactivator-1 alpha; TFAM: mitochondrial transcription factor A; ICC: immunocytochemistry PMD: potentially malignant disorders; CEUS-CNB: contrast-enhanced ultrasound guided transoral core needle; ICG: indocyanine green; RI: radioisotope; USG-FNAC: ultrasound-guided fine-needle aspiration cytology; LOH: loss of heterozygosity; PAS: periodic acid-schiff; GMS: grocott's methenamine silver; AgNOR: silver stained nucleolar organizer regions; PCNA: proliferating cell nuclear antigen; MALDI-ToF MS: matrix-assisted laser desorption/ionisation-time of flight mass spectrometry; FACS: Fluorescence activated cell scanning; <sup>a</sup> If the marker appears in the table, it will correspond to the following content. <sup>b</sup> This is a country where the patient is enrolled. <sup>c</sup> When only one figure is available, it means the total number of cases. \* Solid biopsy included in punch biopsy, incisional biopsy and excisional biopsy. \*\*Oral lesions include tumor tissue, suspected lesions and other lesions associated with oral cancer.
